# Supplementary material for: Parasite Detection in Visceral Leishmaniasis Samples by Dye-Based qPCR Using New Gene Targets of Leishmania infantum and Crithidia
Source: MDPI journal article supplement (doi:10.3390/tropicalmed8080405), 2023-08-08
Supplement: s1 [file s1]

## Supplementary Tables

**Table S1:** Calculations of DNA mass equivalent to one parasite.

| Parasite mass (m) = [n x 1.096e-21 g/bp <sup>#</sup> ] x ploidy +<br>15.8% kDNA mass |                                                                  |
|--------------------------------------------------------------------------------------|------------------------------------------------------------------|
| Specie                                                                               | Calculations                                                     |
| <i>L. infantum</i>                                                                   | Parasite mass of one <i>L. infantum</i> :                        |
|                                                                                      | m= 32.13e6 bp x 1.096e-21 g/ bp x 2 (n)=<br>70.4 fg              |
|                                                                                      | 70.4 + 15.8% kDNA= 81.52 e-15g                                   |
| <i>Crithidia sp</i> LVH-60A                                                          | Parasite mass of one <i>Crithidia sp</i> LVH-<br>60A<br>(LVH60a) |
|                                                                                      | m= 34.4e6 bp x 1.096e-21 g/ bp x 2 (n)=<br>75.4 fg               |
|                                                                                      | 75.4 fg + 15.8%*= 87.3 e-15g                                     |

\*Percentage of *Crithidia sp* LVH-60A kDNA mass was considered to be equal to *Leishmania* spp.

**Table S2:** Serial dilution for qPCR standard curve according to the calculation of the DNA mass equivalent to one parasite of *L. infantum*.

| # Parasites     |               | Required mass of parasite DNA (g) |       | Final concentration of the parasite (g/uL) |
|-----------------|---------------|-----------------------------------|-------|--------------------------------------------|
| 10 <sup>6</sup> |               | 81.5 e-09                         |       | 40.7 e-09                                  |
| 10 <sup>5</sup> |               | 81.5 e-10                         |       | 40.7 e-10                                  |
| 10 <sup>4</sup> | x 81.52 e-15g | 81.5 e-11                         | / 2μL | 40.7 e-11                                  |
| 10 <sup>3</sup> |               | 81.5 e-12                         |       | 40.7 e-12                                  |
| 10 <sup>2</sup> |               | 81.5 e-13                         |       | 40.7 e-13                                  |
| 10 <sup>1</sup> |               | 81.5 e-14                         |       | 40.7 e-14                                  |
| 10 <sup>0</sup> |               | 81.5 e-15                         |       | 40.7 e-15                                  |

| Dilution | Parasite DNA for dilution | [ ] initial g/uL C1 | DNA volume V1 | Dilution volume | Final volume V2 | [ ] final g/uL C2 | Estimate of the number of parasites in 2 uL |
|----------|---------------------------|---------------------|---------------|-----------------|-----------------|-------------------|---------------------------------------------|
| 1        | Stock                     |                     |               |                 |                 | 40.7 e-09         | 10 <sup>6</sup>                             |
| 2        | Tube 1                    | 40.7 e-09           | 10            | 90              | 100             | 40.7 e-10         | 10 <sup>5</sup>                             |
| 3        | Tube 2                    | 40.7 e-10           | 10            | 90              | 100             | 40.7 e-11         | 10 <sup>4</sup>                             |
| 4        | Tube 3                    | 40.7 e-11           | 10            | 90              | 100             | 40.7 e-12         | 10 <sup>3</sup>                             |
| 5        | Tube 4                    | 40.7 e-12           | 10            | 90              | 100             | 40.7 e-13         | 10 <sup>2</sup>                             |
| 6        | Tube 5                    | 40.7 e-13           | 10            | 90              | 100             | 40.7 e-14         | 10 <sup>1</sup>                             |
| 7        | Tube 6                    | 40.7 e-14           | 10            | 90              | 100             | 40.7 e-15         | 10 <sup>0</sup>                             |

Serial dilution according to the calculation of the DNA mass equivalent to one parasite of *Crithidia sp* LVH-60A.

| # Parasites |              | Required mass of<br>parasite DNA (g) |       | Final concentration<br>of the parasite<br>(g/uL) |
|-------------|--------------|--------------------------------------|-------|--------------------------------------------------|
| $10^6$      |              | 87.3 e-09                            |       | 43.6 e-09                                        |
| $10^5$      |              | 87.3 e-10                            |       | 43.6 e-10                                        |
| $10^4$      | x 87.3 e-15g | 87.3 e-11                            | / 2μL | 43.6 e-11                                        |
| $10^3$      |              | 87.3 e-12                            |       | 43.6 e-12                                        |
| $10^2$      |              | 87.3 e-13                            |       | 43.6 e-13                                        |
| $10^1$      |              | 87.3 e-14                            |       | 43.6 e-14                                        |
| $10^0$      |              | 87.3 e-15                            |       | 43.6 e-15                                        |

| Dilution | Parasite<br>DNA for<br>dilution | [ ] initial<br>g/uL<br>C1 | DNA<br>volume<br>V1 | Dilution<br>volume | Final<br>volume<br>V2 | [ ] final<br>g/uL<br>C2 | Estimate of<br>the number<br>of parasites<br>in 2 uL |
|----------|---------------------------------|---------------------------|---------------------|--------------------|-----------------------|-------------------------|------------------------------------------------------|
| 1        | Stock                           |                           |                     |                    |                       | 43.6 e-09               | $10^6$                                               |
| 2        | Tube 1                          | 43.6 e-09                 | 10                  | 90                 | 100                   | 43.6 e-10               | $10^5$                                               |
| 3        | Tube 2                          | 43.6 e-10                 | 10                  | 90                 | 100                   | 43.6 e-11               | $10^4$                                               |
| 4        | Tube 3                          | 43.6 e-11                 | 10                  | 90                 | 100                   | 43.6 e-12               | $10^3$                                               |
| 5        | Tube 4                          | 43.6 e-12                 | 10                  | 90                 | 100                   | 43.6 e-13               | $10^2$                                               |
| 6        | Tube 5                          | 43.6 e-13                 | 10                  | 90                 | 100                   | 43.6 e-14               | $10^1$                                               |
| 7        | Tube 6                          | 43.6 e-14                 | 10                  | 90                 | 100                   | 43.6 e-15               | $10^0$                                               |

**Table S3:** Table of proportions of the number of parasites for the Spike-in assay (used in Figure6):

| Number of parasites ( <i>L. infantum</i> )<br>+ background host [4 ng/ µL] | Number of parasites<br>( <i>Crithidia</i> sp LVH-60A) +<br>background host [4 ng/ µL] |
|----------------------------------------------------------------------------|---------------------------------------------------------------------------------------|
| 5 x 10 <sup>2</sup>                                                        | 0                                                                                     |
| 5 x 10 <sup>4</sup>                                                        | 0                                                                                     |
| 5 x 10 <sup>2</sup>                                                        | 5 x 10 <sup>2</sup>                                                                   |
| 5 x 10 <sup>2</sup>                                                        | 5 x 10 <sup>4</sup>                                                                   |
| 0                                                                          | 5 x 10 <sup>2</sup>                                                                   |
| 0                                                                          | 5 x 10 <sup>4</sup>                                                                   |
| 5 x 10 <sup>2</sup>                                                        | 5 x 10 <sup>2</sup>                                                                   |
| 5 x 10 <sup>4</sup>                                                        | 5 x 10 <sup>2</sup>                                                                   |

OBS: Final volume of each reaction 10µL.

**Table S4:** Informations of gene ID, chromosome, location genome, number copies of p-nitrophenylphosphatase putative gene in *Leishmania* spp.

| Species                                            | Gene code      | Gene description                                                                                                | Chr.            | Location                                                                                                                                                    | Number copies gene |
|----------------------------------------------------|----------------|-----------------------------------------------------------------------------------------------------------------|-----------------|-------------------------------------------------------------------------------------------------------------------------------------------------------------|--------------------|
| <i>L. infantum</i><br>(JPCM5)                      | LinJ31_2420    | p-nitrophenylphosphatase<br>- putative                                                                          | 31              | start: 1 200 125,<br>end: 1 201 141,<br>on reversed<br>strand of<br>LinJ.31                                                                                 | 1                  |
| <i>L. donovani</i><br>(BPK282A1)                   | LdBPK_312410.1 | p-nitrophenylphosphatase<br>- putative                                                                          | 31              | start: 1 165 515,<br>end: 1 166 756,<br>on reversed<br>strand of<br>Ld31_v01s1                                                                              | 1                  |
| <i>L. braziliensis</i><br>(MHOM/BR/75/<br>M2904)   | LbrM.31.2620   | p-nitrophenylphosphatase<br>- putative                                                                          | 31              | start: 1 201 306,<br>end: 1 202 400,<br>on reversed<br>strand of<br>LbrM.31/ start:<br>1 205 959, end:<br>1 206 693, on<br>reversed<br>strand of<br>LbrM.31 | 2                  |
| <i>L. amazonensis</i><br>(MHOM/BR/719<br>73/M2269) | LAMA_000645300 | Haloacid dehalogenase-<br>like hydrolase/ HAD-<br>hydrolase-like/<br>Mitochondrial PGP<br>phosphatase, putative | Not<br>Assigned | start: 1382,<br>end: 2476, on<br>reversed<br>strand of<br>KE390335.1                                                                                        | 1                  |
| <i>L. mexicana</i><br>(MHOM/GT/200<br>1/U1103)     | LmxM.30.2340   | p-nitrophenylphosphatase<br>- putative                                                                          | 30              | start: 1 118 250,<br>end: 1 119 344,<br>on reversed<br>strand of<br>LmxM.30                                                                                 | 1                  |
| <i>L. major</i><br>(Friedlin)                      | LmjF.31.2340   | p-nitrophenylphosphatase<br>- putative                                                                          | 31              | start: 1 152 129,<br>end: 1 163 738,<br>on reversed<br>strand of<br>LmjF.31                                                                                 | 1                  |

Chr.: Chromosome.

**Table S5:** Informations of gene ID, chromosome, location genome, number copies of Catalase gene in *Crithidia sp* LVH-60A, *C. fasciculata* and *Leptomonas* spp.

| Species                                              | Gene code                          | Gene description                                            | Chr.         | Location                                                                          |
|------------------------------------------------------|------------------------------------|-------------------------------------------------------------|--------------|-----------------------------------------------------------------------------------|
| <i>Crithidia fasciculata</i><br>(CfCI)               | <u>CFAC1_250006200<sup>#</sup></u> | Catalase/Catalase-related<br>immune-responsive,<br>putative | 25           | start: 20 383,<br>end: 21 864,<br>on reversed<br>strand of<br>CfaC1_25            |
|                                                      | <u>CFAC1_280006600<sup>#</sup></u> | Catalase/Catalase-related<br>immune-responsive,<br>putative | 28           | start: 26 846,<br>end: 28 327,<br>on reversed<br>strand of<br>CfaC1_28            |
|                                                      | <u>CFAC1_290005500<sup>#</sup></u> | Catalase/Catalase-related<br>immune-responsive,<br>putative | 29           | start: 16 681,<br>end: 18 162,<br>on reversed<br>strand of<br>CfaC1_29            |
|                                                      | <u>CFAC1_160031400<sup>#</sup></u> | Catalase/Catalase-related<br>immune-responsive,<br>putative | 16           | start: 799 545<br>, end:<br>801 026, on<br>forward<br>strand of<br>CfaC1_16       |
| <i>Crithidia sp</i> LVH-<br>60A (LVH60a_C1)          | <u>CP119667.1</u>                  | Catalase - putative                                         | 10           | start: 40<br>0307, end:<br>400394                                                 |
|                                                      | <u>CP119668.1</u>                  | Catalase - putative                                         | 36           | start: 27609.<br>end: 27522                                                       |
|                                                      | <u>CP119663.1</u>                  | Catalase - putative                                         | 5            | start: 271437,<br>end: 271524                                                     |
|                                                      | <u>CP119644.1</u>                  | Catalase - putative                                         | 32           | start:<br>1430866, end:<br>start: 3623,<br>end: 5209, on<br>reversed<br>strand of |
| <i>Leptomonas</i><br><i>pyrrhocoris</i> (H10)        | <u>LpyrH10_15_0020<sup>#</sup></u> | Catalase                                                    | 15           | LpyrH10_15<br>start: 135 714<br>, end:<br>137 201, on<br>forward<br>strand of     |
| <i>Leptomonas</i><br><i>seymouri</i><br>(ATCC_30220) | <u>Lsey_0026_0490<sup>#</sup></u>  | Catalase                                                    | Not Assigned | Lsey_0026                                                                         |

Chr.: Chromosome ;<sup>#</sup>TriTryDB reference

**Table S6:** Coefficient values for qPCR standard curves using hosts DNA as background in reactions. Assays were performed in two qPCR instruments of different brands with curves set up six points in 10-fold serial dilutions.

| <b>Primer LinJ31_2420</b>                                     | <b>Source of DNA background</b> | <b>Slope</b> | <b>R<sup>2</sup>*</b> | <b>Eff%**</b> |
|---------------------------------------------------------------|---------------------------------|--------------|-----------------------|---------------|
| 7500 Fast Dx Real Time PCR Machine (Thermo Fisher Scientific) | DNA Human                       | -3.77        | 0.949                 | 111.65        |
|                                                               | DNA Dog                         | -3.53        | 0.945                 | 113.85        |
|                                                               | DNA Cat                         | -3.12        | 0.988                 | 108.80        |
|                                                               | DNA J774                        | -3.82        | 0.952                 | 114.88        |
|                                                               | DNA Human                       | -3.22        | 0.997                 | 104.26        |
| AriaMx Real- Time PCR System (Agilent)                        | DNA Dog                         | -3.35        | 0.971                 | 114.50        |
|                                                               | DNA Cat                         | -3.35        | 0.998                 | 98.46         |
|                                                               | DNA J774                        | -3.29        | 0.999                 | 101.29        |

\*coefficient of determination; \*\* percentage of reaction efficiency

| <b>Primer Catalase_LVH60-12060_1F</b>                         | <b>Spike-in Assay</b> | <b>Slope</b> | <b>R<sup>2</sup></b> | <b>Eff%</b> |
|---------------------------------------------------------------|-----------------------|--------------|----------------------|-------------|
| 7500 Fast Dx Real Time PCR Machine (Thermo Fisher Scientific) | DNA Human             | -3.16        | 0.953                | 107.13      |
|                                                               | DNA Dog               | -3.02        | 0.945                | 113.85      |
|                                                               | DNA Cat               | -3.47        | 0.981                | 94.10       |
|                                                               | DNA J774              | -3.01        | 0.952                | 114.88      |
|                                                               | DNA Human             | -3.28        | 0.993                | 101.62      |
| AriaMx Real- Time PCR System (Agilent)                        | DNA Dog               | -3.05        | 0.978                | 112.88      |
|                                                               | DNA Cat               | -3.51        | 0.977                | 119.23      |
|                                                               | DNA J774              | -3.30        | 0.998                | 100.76      |

\*coefficient of determination; \*\* percentage of reaction efficiency

**Table S7:** PCR results with species-specific primers and molecular typing by Sanger sequencing.

| Samples    | Tissue           | SSU rRNA (18S) marker           | PCR Linj31Seq | PCR Crid2.1Seq | Clinical isolate (ID) |
|------------|------------------|---------------------------------|---------------|----------------|-----------------------|
| BM.VL1     | Bone Marrow      | <i>L. infantum</i>              | P             | NA             | LVHSE09               |
| BM.VL2     | Bone Marrow      | <i>L. infantum</i>              | P             | NA             | LVHSE27               |
| BM.VL4     | Bone Marrow      | <i>L. infantum</i>              | P             | NA             | LVHSE32               |
| BM.VL5     | Bone Marrow      | <i>L. infantum</i>              | P             | NA             | LVHSE43               |
| BM.VL6     | Bone Marrow      | <i>L. infantum</i>              | P             | NA             | LVHSE52               |
| BM.VL7     | Bone Marrow      | <i>L. infantum</i>              | P             | NA             | LVHSE54               |
| BM.VL8     | Bone Marrow      | <i>L. infantum</i>              | P             | NA             | No                    |
| BM.VL10    | Bone Marrow      | <i>L. infantum</i>              | P             | NA             | LVHSE59               |
| BM.VL11    | Bone Marrow      | <i>L. infantum</i>              | P             | NA             | LVHSE61               |
| BM.VL12    | Bone Marrow      | <i>L. infantum</i>              | P             | NA             | LVHSE62               |
| BM.VL15    | Bone Marrow      | <i>L. infantum</i>              | P             | NA             | LVHSE49               |
| BM.VL16    | Bone Marrow      | <i>L. infantum</i>              | P             | NA             | LVHSE50               |
| BM.VL17    | Bone Marrow      | #                               | P             | NA             | No                    |
| BMVL 60*   | Bone Marrow      | <i>Crithidia</i> sp.<br>LVH-60A | N             | NA             | LVHSE60               |
| GJ         | Bone Marrow      | <i>Crithidia</i> sp.<br>LVH-60A | NP            | NA             | LVHSE148              |
| JFJ        | Bone Marrow      | <i>L. infantum</i>              | NP            | NA             | No                    |
| LBV        | Bone Marrow      | <i>L. infantum</i>              | NP            | NA             | No                    |
| AV         | Bone Marrow      | <i>L. infantum</i>              | NP            | NA             | No                    |
| P13D0*     | Peripheral blood | <i>L. infantum</i>              | P             | NA             | LVHSE60               |
| P11D0      | Peripheral blood | <i>L. infantum</i>              | P             | NA             | No                    |
| P12D0      | Peripheral blood | <i>L. infantum</i>              | P             | NA             | No                    |
| P16D0      | Peripheral blood | <i>L. infantum</i>              | P             | NA             | LVHSE101              |
| P23D0+7+14 | Peripheral blood | <i>L. infantum</i>              | P             | NA             | No                    |
| P37D       | Peripheral blood | #                               | N             | NA             | No                    |
| P39D       | Peripheral blood | <i>L. infantum</i>              | P             | NA             | No                    |

\*Relapsed patient (study by Maruyama *et al.* 2019); #: TRY927/SSU561 poor quality sequencing; P: PCR positive; N: PCR negative; NP: Not performed; NA: not compatible with amplicon band size; ID: isolate identification LVHSE



**Table S8:** Table of PCR results with LinJ31seq and Crid2.1seq primers. TRY/SSU column displays molecular typing by amplicon analysis (sequencing Sanger) of clinical isolates.

| Clinical isolates      | Origin of the isolate | PCR LinJ31Seq  | PCR Crid2.1Seq | TRY/SSU Amplicons   |
|------------------------|-----------------------|----------------|----------------|---------------------|
| L VHSE09 <sup>a</sup>  | Bone marrow           | N              | P              | <i>Crithidia sp</i> |
| L VHSE21               | Bone marrow           | N              | P              | <i>Crithidia sp</i> |
| L VHSE23 <sup>a</sup>  | Bone marrow           | N              | P              | <i>Crithidia sp</i> |
| L VHSE27               | Bone marrow           | N              | P              | <i>Crithidia sp</i> |
| L VHSE29               | Bone marrow           | N              | P              | <i>Crithidia sp</i> |
| L VHSE32               | Bone marrow           | N              | P              | <i>Crithidia sp</i> |
| L VHSE33               | Bone marrow           | N              | P              | <i>Crithidia sp</i> |
| L VHSE41               | Bone marrow           | N              | P              | <i>Crithidia sp</i> |
| L VHSE43 <sup>a</sup>  | Bone marrow           | N              | p <sup>#</sup> | <i>Crithidia sp</i> |
| L VHSE44               | Bone marrow           | N              | P              | <i>Crithidia sp</i> |
| L VHSE49               | Bone marrow           | N              | P              | <i>Crithidia sp</i> |
| L VHSE52               | Bone marrow           | N              | P              | <i>Crithidia sp</i> |
| L VHSE54               | Bone marrow           | N              | P              | <i>Crithidia sp</i> |
| L VHSE55               | Bone marrow           | N              | P              | <i>Crithidia sp</i> |
| L VHSE56               | Bone marrow           | N              | P              | <i>Crithidia sp</i> |
| L VHSE57               | Bone marrow           | P              | p <sup>#</sup> | <i>Crithidia sp</i> |
| L VHSE59               | Bone marrow           | P              | P              | <i>Crithidia sp</i> |
| L VHSE61               | Bone marrow           | N              | P              | <i>Crithidia sp</i> |
| L VHSE62               | Bone marrow           | N              | P              | <i>Crithidia sp</i> |
| L VHSE65               | Bone marrow           | N              | P              | <i>Crithidia sp</i> |
| L VHSE66               | Bone marrow           | P              | P              | <i>Crithidia sp</i> |
| L VHSE72               | Bone marrow           | N              | P              | <i>Crithidia sp</i> |
| L VHSE79               | Bone marrow           | N              | P              | <i>Crithidia sp</i> |
| L VHSE80               | Bone marrow           | N              | P              | <i>Crithidia sp</i> |
| L VHSE81               | Bone marrow           | N              | P              | <i>Crithidia sp</i> |
| L VHSE82               | Bone marrow           | N              | P              | <i>Crithidia sp</i> |
| L VHSE84               | Bone marrow           | N              | P              | <i>Crithidia sp</i> |
| L VHSE85               | Bone marrow           | N              | P              | <i>Crithidia sp</i> |
| L VHSE94               | Bone marrow           | N              | p <sup>#</sup> | <i>Crithidia sp</i> |
| L VHSE94a              | Skin tissue           | N              | P              | <i>Crithidia sp</i> |
| L VHSE101 <sup>a</sup> | Bone marrow           | N              | P              | <i>Crithidia sp</i> |
| L VHSE103              | Bone marrow           | N              | P              | <i>Crithidia sp</i> |
| L VHSE105              | Bone marrow           | N              | P              | <i>Crithidia sp</i> |
| L VHSE107              | Bone marrow           | N              | P              | *                   |
| L VHSE109              | Bone marrow           | N              | P              | <i>Crithidia sp</i> |
| L VHSE110              | Bone marrow           | N              | P              | <i>Crithidia sp</i> |
| L VHSE115              | Bone marrow           | P              | N              | *                   |
| L VHSE117 <sup>b</sup> | Bone marrow           | P              | P              | <i>Crithidia sp</i> |
| L VHSE119              | Bone marrow           | P              | N              | <i>L. infantum</i>  |
| L VHSE120 <sup>b</sup> | Spleen                | N              | P              | <i>Crithidia sp</i> |
| L VHSE132              | Bone marrow           | P              | N              | *                   |
| L VHSE133              | Bone marrow           | P              | N              | <i>L. infantum</i>  |
| L VHSE134              | Bone marrow           | N              | P              | <i>Crithidia sp</i> |
| L VHSE135              | Bone marrow           | N              | P              | <i>Crithidia sp</i> |
| L VHSE137              | Bone marrow           | N              | P              | *                   |
| L VHSE138              | Bone marrow           | N              | P              | *                   |
| L VHSE139              | Bone marrow           | N              | P              | <i>Crithidia sp</i> |
| L VHSE140              | Bone marrow           | N              | P              | <i>Crithidia sp</i> |
| L VHSE141              | Bone marrow           | N              | P              | <i>Crithidia sp</i> |
| L VHSE142              | Bone marrow           | N              | P              | *                   |
| L VHSE146              | Bone marrow           | N              | P              | *                   |
| L VHSE148              | Bone marrow           | N              | P              | *                   |
| L VHSE149              | Bone marrow           | N              | P              | <i>Crithidia sp</i> |
| L VHSE153              | Bone marrow           | p <sup>#</sup> | N              | *                   |

|                            |             |                |   |                     |
|----------------------------|-------------|----------------|---|---------------------|
| LVHSE159                   | Bone marrow | P <sup>#</sup> | N | *                   |
| LVHSE160                   | Bone marrow | P <sup>#</sup> | N | <i>L. infantum</i>  |
| LVHSE161 <sup>b#</sup>     | Bone marrow | P              | N | <i>L. infantum</i>  |
| LVHSE162                   | Bone marrow | P              | N | *                   |
| LVHSE161a_N1 <sup>b#</sup> | Skin nodule | P              | N | <i>L. infantum</i>  |
| LVHSE161a_N2 <sup>b#</sup> | Skin nodule | P              | N | <i>L. infantum</i>  |
| LVHSE60**                  | Bone marrow | N              | P | <i>Crithidia sp</i> |
| LVHSE60a**                 | Skin papule | N              | P | <i>Crithidia sp</i> |

\*Poor quality sequencing. <sup>a</sup>isolate from relapsed patient. <sup>b</sup>Isolate from same patient in year 2017(study by Rogerio *et al.* 2023) (accession numbers OQ581230.1 and OQ581233.1); <sup>b#</sup>Relapsed patient in year 2020 (same patient of the clinical isolate LVHSE117, study by Rogerio *et al.* 2023) (accession numbers OQ581236.1 and OQ581240.1). \*\*Relapsed patient (study by Maruyama *et al.* 2019) (Number accession OQ581229.1 and OQ581228.1).

**Table S9.** Accession numbers of small subunit rRNA (ssrRNA) sequences used in phylogenetic analysis displayed in Supplementary Figure S8 and Figure S9.

| Sequences retrieved from NCBI                              |                                                                                                           |
|------------------------------------------------------------|-----------------------------------------------------------------------------------------------------------|
| <i>Crithidia fasciculata</i>                               | Y00055.1                                                                                                  |
| <i>Leishmania infantum</i>                                 | XR_001203206.1                                                                                            |
| <i>Leishmania chagasi</i>                                  | KU948455.1                                                                                                |
| <i>Leishmania donovani</i>                                 | FR799614.1                                                                                                |
| Sequences generated in this work                           |                                                                                                           |
| Trypanosomatidae sequences from human samples (Figure S8). | <a href="http://www.ebi.ac.uk/ena/data/view/PRJEB25906">http://www.ebi.ac.uk/ena/data/view/PRJEB25906</a> |
| Trypanosomatidae sequences from dog samples (Figure S9).   | To be released soon                                                                                       |
